# Supplementary material for: Tetramerization and interdomain flexibility of the replication initiation controller YabA enables simultaneous binding to multiple partners
Source: PubMed Central journal article supplement (PMC4705661; doi:10.1093/nar/gkv1318), 2015-11-28
Supplement: supp_gkv1318_nar-02449-v-2015-File010.pdf [file supp_gkv1318_nar-02449-v-2015-File010.pdf]

**Table S1 - Putative YabA proteins currently described as hypothetical proteins or proteins with unknown function.**

| Protein Description                | Organism                                                  | Accession Number | Score, Query coverage, E-value |
|------------------------------------|-----------------------------------------------------------|------------------|--------------------------------|
| protein of unknown function DUF972 | Bacillus coagulans 36D1                                   | ZP_04431360.1    | 68.5, 100%, 2e-10              |
| hypothetical protein BSG1_10613    | Bacillus sp. SG-1                                         | ZP_01861149.1    | 67.3, 100%, 5e-10              |
| protein of unknown function DUF972 | Bacillus selenitireducens MLS10                           | YP_003698155.1   | 66.2, 100%, 1e-09              |
| protein of unknown function DUF972 | Bacillus cellulolyticus DSM 2522                          | ZP_06363936.1    | 65.4, 97%, 2e-09               |
| conserved hypothetical protein     | Bacillus cereus AH1134                                    | ZP_03233554.1    | 65.0, 100%, 3e-09              |
| conserved hypothetical protein     | Listeria monocytogenes str. 4b H7858                      | ZP_00230634.1    | 64.3, 100%, 5e-09              |
| hypothetical protein lp_0706       | Lactobacillus plantarum WCFS1                             | NP_784465.1      | 63.9, 97%, 6e-09               |
| protein of unknown function DUF972 | Geobacillus sp. WCH70                                     | YP_002948237.1   | 63.9, 100%, 7e-09              |
| hypothetical protein lse_0147      | Listeria seeligeri serovar 1/2b str. SLCC3954             | YP_003463390.1   | 63.5, 100%, 7e-09              |
| protein of unknown function DUF972 | Paenibacillus sp. JDR-2                                   | YP_003008785.1   | 63.1, 97%, 9e-09               |
| protein of unknown function DUF972 | Geobacillus sp. Y412MC10                                  | YP_003240136.1   | 63.1, 97%, 1e-08               |
| hypothetical protein PTH_0065      | Pelotomaculum thermopropionicum SI                        | YP_001210615.1   | 61.9, 100%, 2e-08              |
| hypothetical protein Swol_0044     | Syntrophomonas wolfei subsp. wolfei str. Goettingen       | YP_752774.1      | 61.9, 97%, 2e-08               |
| hypothetical conserved protein     | Geobacillus kaustophilus HTA426                           | BAD74312.1       | 61.6, 97%, 3e-08               |
| hypothetical protein CAT7_06883    | Carnobacterium sp. AT7                                    | ZP_02184374.1    | 61.6, 97%, 3e-08               |
| hypothetical protein HM1_0756      | Heliobacterium modesticaldum Ice1                         | YP_001679810.1   | 61.2, 100%, 4e-08              |
| hypothetical protein GALLO_1751    | Streptococcus gallolyticus UCN34                          | YP_003431166.1   | 61.2, 100%, 4e-08              |
| hypothetical protein SDEG_0452     | Streptococcus dysgalactiae subsp. equisimilis GGS_124     | YP_002996168.1   | 61.2, 100%, 4e-08              |
| hypothetical protein Exig_0027     | Exiguobacterium sibiricum 255-15                          | YP_001812531.1   | 61.2, 97%, 4e-08               |
| hypothetical protein STRINF_01993  | Streptococcus infantarius subsp. infantarius ATCC BAA-102 | ZP_02921109.1    | 61.2, 100%, 4e-08              |
| hypothetical protein EF2760        | Enterococcus faecalis V583                                | NP_816388.1      | 60.8, 97%, 5e-08               |
| protein of unknown function DUF972 | Bacillus tusciae DSM 2912                                 | YP_003587970.1   | 60.8, 97%, 5e-08               |
| hypothetical protein LAF_029       | Lactobacillus fermentum IFO 3956                          | YP_001843106.1   | 60.4, 84%, 6e-08               |
| protein of unknown function DUF972 | Exiguobacterium sp. AT1b                                  | YP_002886073.1   | 60.4, 97%, 7e-08               |
| protein of unknown function DUF972 | Thermincola sp. JR                                        | YP_003638886.1   | 60.0, 97%, 9e-08               |
| hypothetical protein LSA0343       | Lactobacillus sakei subsp. sakei 23K                      | YP_394956.1      | 59.6, 97%, 1e-07               |
| Protein of unknown function DUF972 | Enterococcus faecium DO                                   | ZP_00603925.1    | 58.9, 97%, 2e-07               |
| conserved hypothetical             | Streptococcus pyogenes                                    | BAC64661.1       | 58.1, 97%, 3e-07               |

|                                       |                                               |                |                   |
|---------------------------------------|-----------------------------------------------|----------------|-------------------|
| protein                               | SSI-1                                         |                |                   |
| hypothetical protein Dred_0062        | Desulfotomaculum reducens MI-1                | YP_001111437.1 | 58.1, 97%, 3e-07  |
| hypothetical protein CHY_0053         | Carboxydotherrmus hydrogenoformans Z-2901     | YP_358925.1    | 57.7, 100%, 5e-07 |
| conserved hypothetical protein        | Lactobacillus jensenii 269-3                  | ZP_04645668.1  | 57.7, 94%, 5e-07  |
| protein of unknown function DUF972    | Desulfotomaculum acetoxidans DSM 771          | YP_003189689.1 | 57.3, 100%, 5e-07 |
| hypothetical protein GCWU000282_00875 | Catonella morbi ATCC 51271                    | ZP_04449646.1  | 57.3, 94%, 5e-07  |
| hypothetical protein Moth_0045        | Moorella thermoacetica ATCC 39073             | YP_428927.1    | 56.9, 100%, 6e-07 |
| protein of unknown function DUF972    | Syntrophothermus lipocalidus DSM 12680        | YP_003701422.1 | 56.2, 94%, 1e-06  |
| hypothetical protein DSY0124          | Desulfitobacterium hafniense Y51              | YP_516357.1    | 56.2, 97% 1e-06   |
| protein of unknown function DUF972    | Desulfitobacterium hafniense DCB-2            | YP_002456568.1 | 56.2, 97%, 1e-06  |
| hypothetical protein Hore_20340       | Halothermothrix orenii H 168                  | YP_002509774.1 | 54.6, 100%, 3e-06 |
| conserved hypothetical protein        | Lactobacillus coleohominis 101-4-CHN          | ZP_05553573.1  | 54.6, 97%, 3e-06  |
| conserved hypothetical protein        | Staphylococcus hominis SK119                  | ZP_04060918.1  | 54.6, 92%, 3e-06  |
| hypothetical protein SAD30_0199       | Staphylococcus aureus D30                     | ZP_06022830.1  | 54.6, 89%, 4e-06  |
| protein of unknown function DUF972    | Alicyclobacillus acidocaldarius LAA1          | ZP_03493323.1  | 53.9, 97%, 6e-06  |
| protein of unknown function DUF972    | Lactobacillus reuteri 100-23                  | ZP_03074103.1  | 53.9, 94%, 6e-06  |
| hypothetical protein Lreu_0333        | Lactobacillus reuteri DSM 20016               | YP_001270940.1 | 53.5, 94%, 7e-06  |
| hypothetical protein MCCL_1926        | Macrocooccus caseolyticus JCSC5402            | YP_002561329.1 | 50.4, 89%, 7e-05  |
| hypothetical protein Sca_0127         | Staphylococcus carnosus subsp. carnosus TM300 | YP_002633225.1 | 50.0, 97%, 9e-05  |

**Table S2- Detection of proteins with distant sequence or structural relationships with the C-terminal region of YabA using PHI-BLAST**

| PHI-BLAST Pattern <sup>a</sup> | Non-redundant databank         |             |         | Protein Data Bank (PDB) |             |         |                                                                            |
|--------------------------------|--------------------------------|-------------|---------|-------------------------|-------------|---------|----------------------------------------------------------------------------|
|                                | Accession number               | Query cover | E-value | PDB Code                | Query cover | E-value | Zinc finger motif                                                          |
| H-x-C-x(11)-C-x(2)-C           | <a href="#">ABG65911.1</a>     | 72 %        | 7e-08   | 2EA5-A                  | 20 %        | 2e-06   | RING finger domain C3HC4 (2 Zn)                                            |
|                                | <a href="#">AAL25175.1</a>     | 72 %        | 6e-07   | 2CON-A                  | 21 %        | 2e-06   | Zn-ribbon module C4                                                        |
|                                | <a href="#">XP_001319569.1</a> | 67 %        | 2e-04   | 2ECL-A                  | 17 %        | 1e-04   | Ring-box protein C6H2C4 (3 Zn)                                             |
| F- H-x(1,4)-C-x(7,14)-C-x(2)-C | <a href="#">YP_002379624.1</a> | 73 %        | 2e-05   | 2G6Q-A                  | 43 %        | 1e-18   | PHD domain C4HC3 (2 Zn)                                                    |
|                                | <a href="#">AAI72933.1</a>     | 73 %        | 1e-04   | 1WES-A                  | 43 %        | 1e-18   | PHD domain C4HC3 (2 Zn)                                                    |
|                                | <a href="#">AAI44321.1</a>     | 73 %        | 1e-04   | 2KIJ-A                  | 47 %        | 3e-16   | No Zn finger motif                                                         |
| H-x(1,4)-C-x(7,14)-C-x(2)-C    | <a href="#">YP_002379624.1</a> | 73 %        | 1e-05   | 1JOC-A                  | 63 %        | 3e-21   | FYVE domain C8 (2 Zn)                                                      |
|                                | <a href="#">AAI72933.1</a>     | 73 %        | 3e-05   | 2K2C-A                  | 50 %        | 4e-10   | CHY, CTCHY zinc finger domain, Ring finger (6 Zn) CHC4H2C4, C2HC + C2HC3HC |
|                                | <a href="#">AAI44321.1</a>     | 73 %        | 4e-05   | 2DKT-A                  | 49 %        | 3e-09   | Ring finger and CHY zinc finger domain (6 Zn) CHC4H2C4, C2HC + C2HC3HC     |
| C-x(7,14)-C-x(2)-C             | <a href="#">YP_002379624.1</a> | 73 %        | 2e-05   | 1JOC-A                  | 63 %        | 2e-24   | FYVE domain C8 (2 Zn)                                                      |
|                                | <a href="#">AAI72933.1</a>     | 73 %        | 7e-05   | 1HYI-A                  | 28 %        | 2e-05   | FYVE domain C8 (2 Zn)                                                      |
|                                | <a href="#">AAI44321.1</a>     | 73 %        | 9e-05   | 2QA7-A                  | 73 %        | 0.037   | No Zn finger motif                                                         |

<sup>a</sup> Patterns are described using the one-letter amino acid code. 'x' represents any amino acid. The numbers inside parenthesis represent the distance between two given amino acids

For the Non-redundant databank, only ABG65911.1 has a zinc finger type (C3HC4) and AAL25175.1 has a RING-H2 finger.

**Table S3 - Phenotypic interaction assay of YabA mutants obtained by saturated mutagenesis at targeted sites (this study).**

| YabA mutants               | Interacting partners |      |      |
|----------------------------|----------------------|------|------|
| AA substitutions           | DnaA                 | DnaN | YabA |
| F62T/Y/H/S/V/C/I/A/L/D/C/G | +                    | +    | +    |
| E75G/Q                     | +                    | +    | +    |
| Y90F/S/L                   | -                    | -    | +    |
| Y90C                       | +                    | -    | +    |
| F94N                       | +                    | +/-  | +    |
| F94D/P/A/L/G/T             | -                    | +/-  | +    |
| F94I/S/V                   | -                    | +    | +    |
| F94Y                       | +                    | +    | +    |
| I96N                       | -                    | +/-  | +    |
| H95L/I                     | -                    | -    | +    |
| H95Y                       | -                    | +    | +    |
| H95G                       | +                    | +    | +    |
| R105V/L/A/T/S/Q/I/H/Y      | +                    | +    | +    |
| R105E/G/D                  | -                    | +    | +    |
| K106V/L/I/T/S/G/E/A/R      | +                    | +    | +    |
| E107R/D/T                  | +                    | -    | +    |
| E107M/L                    | +                    | +    | +    |
| E107Q/S                    | +                    | +/-  | +    |
| D108S                      | +                    | -    | +    |
| D108C                      | +                    | +/-  | +    |
| F111Y/N/S/A/D              | +                    | -    | +    |
| N117L                      | +                    | +    | +    |
| N117K                      | +                    | -    | +    |
| K118N/W/A/D/V/P/M/Y/E      | +                    | +    | +    |
| K119N/E/Q                  | +                    | +    | +    |
| K119R                      | +                    | -    | +    |

YabA mutant baits were confirmed for the specific loss of one interaction in a yeast two-hybrid assay. The different YabA mutant baits in the yeast haploid strain PJ69-4a (lines) were mated with PJ69-4□ strains containing the preys YabA, DnaA, and DnaN (columns). Interaction phenotypes were monitored using selective media as described in *Materials and Methods*. Mutants lacking the ability to grow onto SC-LUA are indicated by crosses of the corresponding colors

**Table S4 - *Bacillus subtilis* strains**

| Strain  | Genotype                                                                             | Source/construction                   |
|---------|--------------------------------------------------------------------------------------|---------------------------------------|
| JJS142  | JJS39 $\Delta yabA$                                                                  | Noirot-Gros et al., 2006 <sup>a</sup> |
| JJS138  | JJS39 <i>yabA-N85D</i> ( <i>yabA-Aim</i> )                                           | Noirot-Gros et al., 2006 <sup>a</sup> |
| JJS352  | JJS142 <i>amyE::Pxyl-cfp-yabA-F111Y</i> ( <i>Spc<sup>R</sup></i> )                   | This work                             |
| JJS353  | JJS142 <i>amyE::Pxyl-cfp yabA-E107R</i> ( <i>Spc<sup>R</sup></i> )                   | This work                             |
| JJS354  | JJS142 <i>amyE::Pxyl-cfp yabA-E107T</i> ( <i>Spc<sup>R</sup></i> )                   | This work                             |
| JJS355  | JJS142 <i>amyE::Pxyl-cfp yabA-D108S</i> ( <i>Spc<sup>R</sup></i> )                   | This work                             |
| JJS358  | JJS142 <i>amyE::Pxyl-cfp-yabA-F94S</i> ( <i>Spc<sup>R</sup></i> )                    | This work                             |
| JJS359  | JJS142 <i>amyE::Pxyl-cfp-yabA-R105E</i> ( <i>Spc<sup>R</sup></i> )                   | This work                             |
| NIS6052 | <i>yfp-yabA</i> ( <i>Cm<sup>R</sup></i> )                                            | Hayashi et al., 2005 <sup>b</sup>     |
| MYA002  | $\Delta yabA::spec yfp-yabA-N85D$ ( <i>Spc<sup>R</sup></i> , <i>Cm<sup>R</sup></i> ) | Noirot-Gros et al., 2006 <sup>a</sup> |
| JJS356  | JJS352 <i>yfp-yabA-N85D</i> ( <i>Spc<sup>R</sup>Cm<sup>R</sup></i> )                 | This work                             |
| JJS357  | JJS354 <i>yfp-yabA-N85D</i> ( <i>Spc<sup>R</sup>Cm<sup>R</sup></i> )                 | This work                             |

<sup>a</sup> Noirot-Gros MF, Velten M, Yoshimura M, McGovern S, Morimoto T, Ehrlich SD, Ogasawara N, Polard P, Noirot P. (2006) Functional dissection of YabA, a negative regulator of DNA replication initiation in *Bacillus subtilis*. *Proc Natl Acad Sci U S A*. Feb 14;103(7):2368-73

<sup>b</sup> Hayashi M, Ogura Y, Harry EJ, Ogasawara N, Moriya S. (2005) *Bacillus subtilis* YabA is involved in determining the timing and synchrony of replication initiation. *FEMS Microbiol Lett*. Jun 1;247(1):73-9

**Table S5: YabA construct primers and coding regions:** listed are the primers used for cloning of YabA constructs and their resultant coding regions. Bases written in bold have been appended for annealing or insertion into the YSBLIC3C vector.

| Construct                           | Residues of YabA Encoded | Cloning Primers |                                                                  | Template Used           |
|-------------------------------------|--------------------------|-----------------|------------------------------------------------------------------|-------------------------|
| pET-YSBLIC3C-YabA                   | 1-119                    | Fwd             | 5'- <b>CCAGGGACCAGCAAT</b> GGATAAAAAAGAGTTATTTGATACAGTCATTAAC-3' | <i>Bsu.</i> genomic DNA |
|                                     |                          | Rev             | 5'- <b>GAGGAGAAGGCGGTTATTTTTTA</b> TTTAAGAATGACAGACAGAAAAGAC-3'  |                         |
| pET-YSBLIC3C-YabA <sup>1-58</sup>   | 1-58                     | Fwd             | 5'- <b>CGACGCAGCAGT</b> AACGCGCCTTC TCCTCACATATGGC-3'            | YSBLIC3C-YabA           |
|                                     |                          | Rev             | 5'- <b>AAGGCGGTTACTGCTGCGTCGT</b> ATCGTCCAGC-3'                  |                         |
| pET-YSBLIC3C-YabA <sup>70-119</sup> | 70-119                   | Fwd             | 5'- <b>AGGGACCAGCAAAAACACAGAA</b> GACAGAGCAAAGTATATAGGG-3'       | YSBLIC3C-YabA           |
|                                     |                          | Rev             | 5'- <b>GTCTTCTGTGTTTTGCTGGTCC</b> CTGGAACAGAAGTCC-3'             |                         |
